# Supplementary material for: Loss of lysyl hydroxylase 2 activates CRP-mediated cancer invasion through MEK/ERK/MMP9 signaling in the bone-microenvironment
Source: Research Square preprint supplement (doi:10.21203/rs.3.rs-7989174/v1), 2026-01-12
Supplement: Supplementary file 1 [file ace91f6920ad8e00652af2bc.pdf]

## Supplementary information for

### **Loss of lysyl hydroxylase 2 activates CRP-mediated cancer invasion through MEK/ERK/MMP9 signaling in the bone-microenvironment**

Saori Tomiku<sup>1</sup>, Atsushi Kasamatsu<sup>1,2\*</sup>, Tomoaki Saito<sup>1</sup>, Reo Fukushima<sup>2</sup>, Yuki Nishimura<sup>1</sup>, Tamon Narukawa<sup>1</sup>, Anna Tomimatsu<sup>1</sup>, Masumi Igari<sup>1</sup>, Yui Shirafuji<sup>1</sup>, Manabu Iyoda<sup>2</sup>, Dai Nakashima<sup>2</sup>, Mitsuo Yamauchi<sup>3</sup>, Joel Moss<sup>4</sup>, Katsuhiro Uzawa<sup>1,2\*</sup>

<sup>1</sup>*Department of Oral Science, Graduate School of Medicine, Chiba University, Chiba, Japan*

<sup>2</sup>*Department of Dentistry and Oral-Maxillofacial Surgery, Chiba University Hospital, Chiba, Japan*

<sup>3</sup>*Department of Biomedical Sciences, Adams School of Dentistry, University of North Carolina at Chapel Hill, Chapel Hill, NC, United States of America*

<sup>4</sup>*Critical Care Medicine and Pulmonary Branch, National Heart, Lung, and Blood Institute, National Institutes of Health, Bethesda, MD, United States of America*

#### **\*Corresponding Authors:**

Katsuhiro Uzawa, DDS, PhD, FIBCSOMS

Professor

Department of Oral Science

Graduate School of Medicine, Chiba University

1-8-1 Inohana, Chuo-ku

Chiba, 260-8670, Japan

Phone: +81-43-226-2300

E-mail: [uzawak@faculty.chiba-u.jp](mailto:uzawak@faculty.chiba-u.jp)

Atsushi Kasamatsu, DDS, PhD, FIBCSOMS

Associate Professor

Department of Oral Science

Graduate School of Medicine, Chiba University

1-8-1 Inohana, Chuo-ku

Chiba, 260-8670, Japan

Phone: +81-43-226-2300

E-mail: [kasamatsua@faculty.chiba-u.jp](mailto:kasamatsua@faculty.chiba-u.jp)

**Supplemental Figure S1**  
**(Full length blots of Figure 1B )**

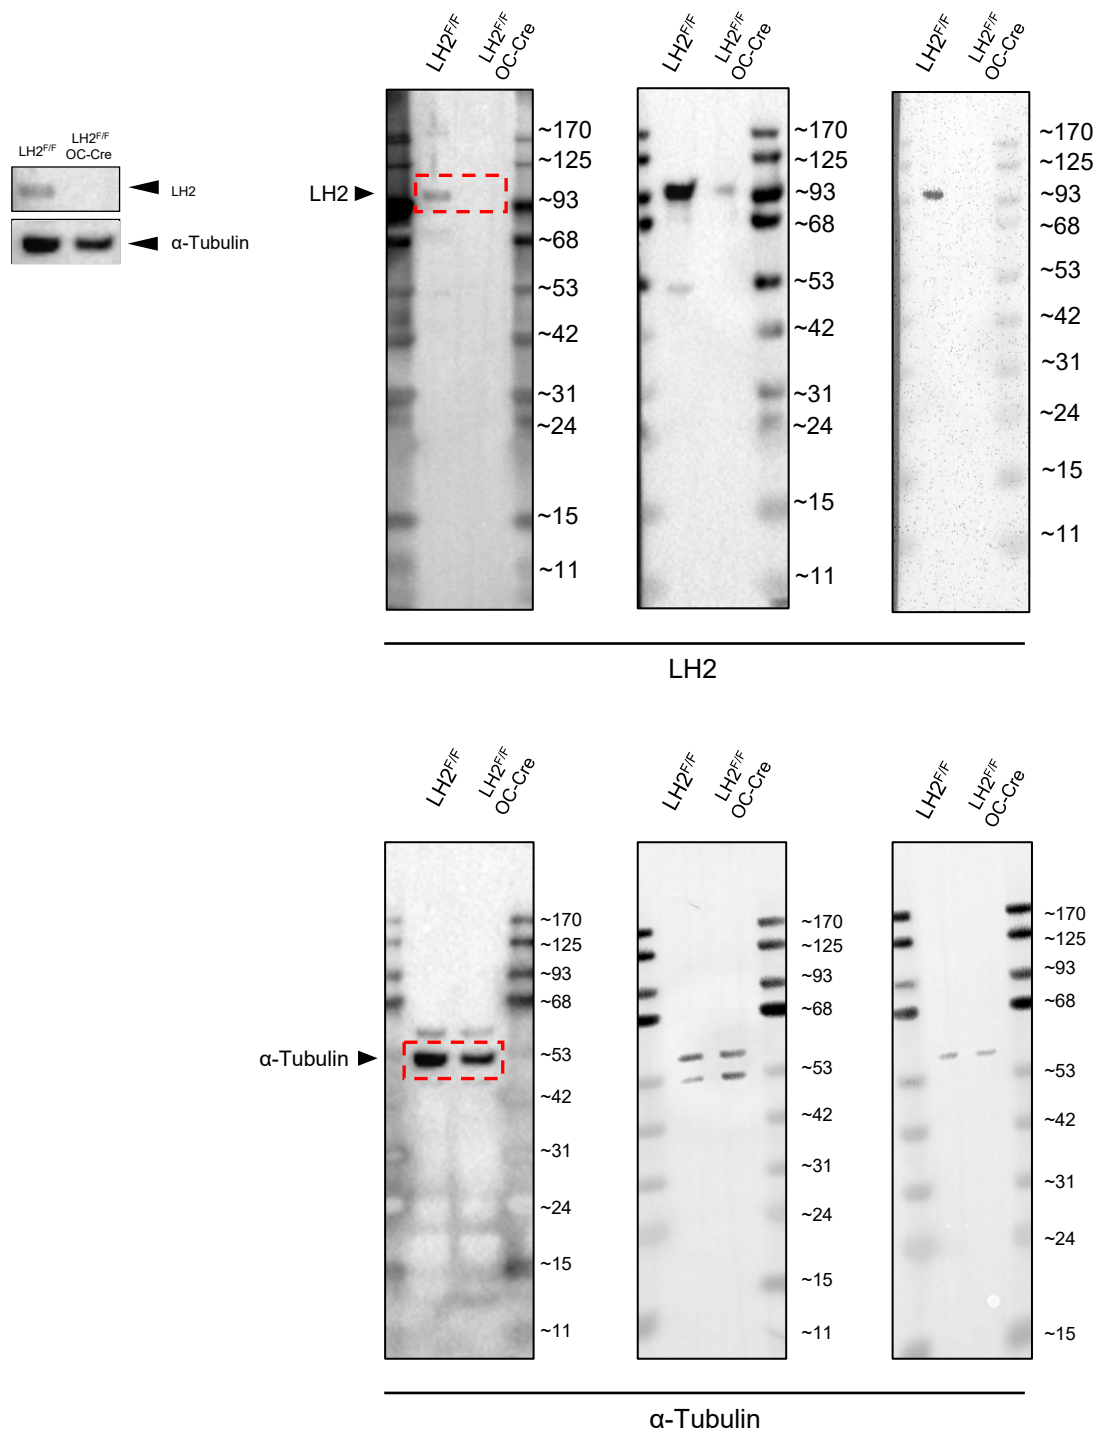

**Supplementary Figure S1 | Full-length unprocessed Western blots of LH2 and α-Tubulin.**

The samples derived from these experiments were used for immunoblotting shown in Figures 1A. LH2 and α-Tubulin were detected on separate membranes derived from the same samples. Three independent experiments are shown. All blots were detected under identical exposure and contrast settings.

## Supplemental Figure S2

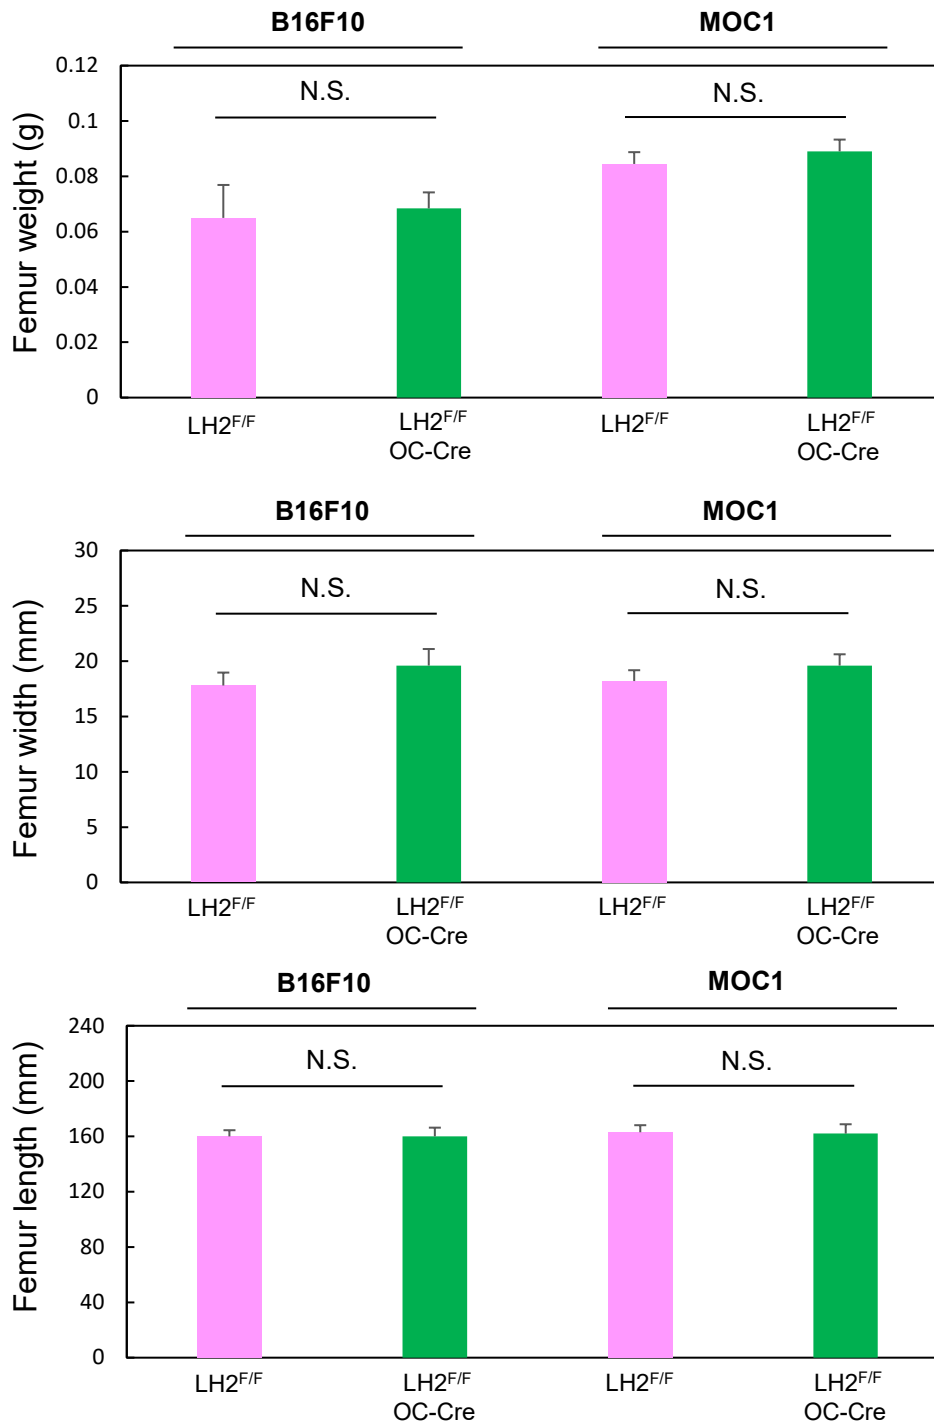

### Supplementary Figure S2 | The morphology of femurs between LH2<sup>F/F</sup> and LH2<sup>F/F</sup> OC-Cre mice after cancer cell injection.

The weight, length, and width of femurs in LH2<sup>F/F</sup> and LH2<sup>F/F</sup> OC-Cre mice were collected and measured on day 14 after intra-femoral cancer cell injection. Data are presented as mean  $\pm$  SD (n = 5 per group). No significant difference was observed between groups (Welch's t-test).

## Supplemental Figure S3

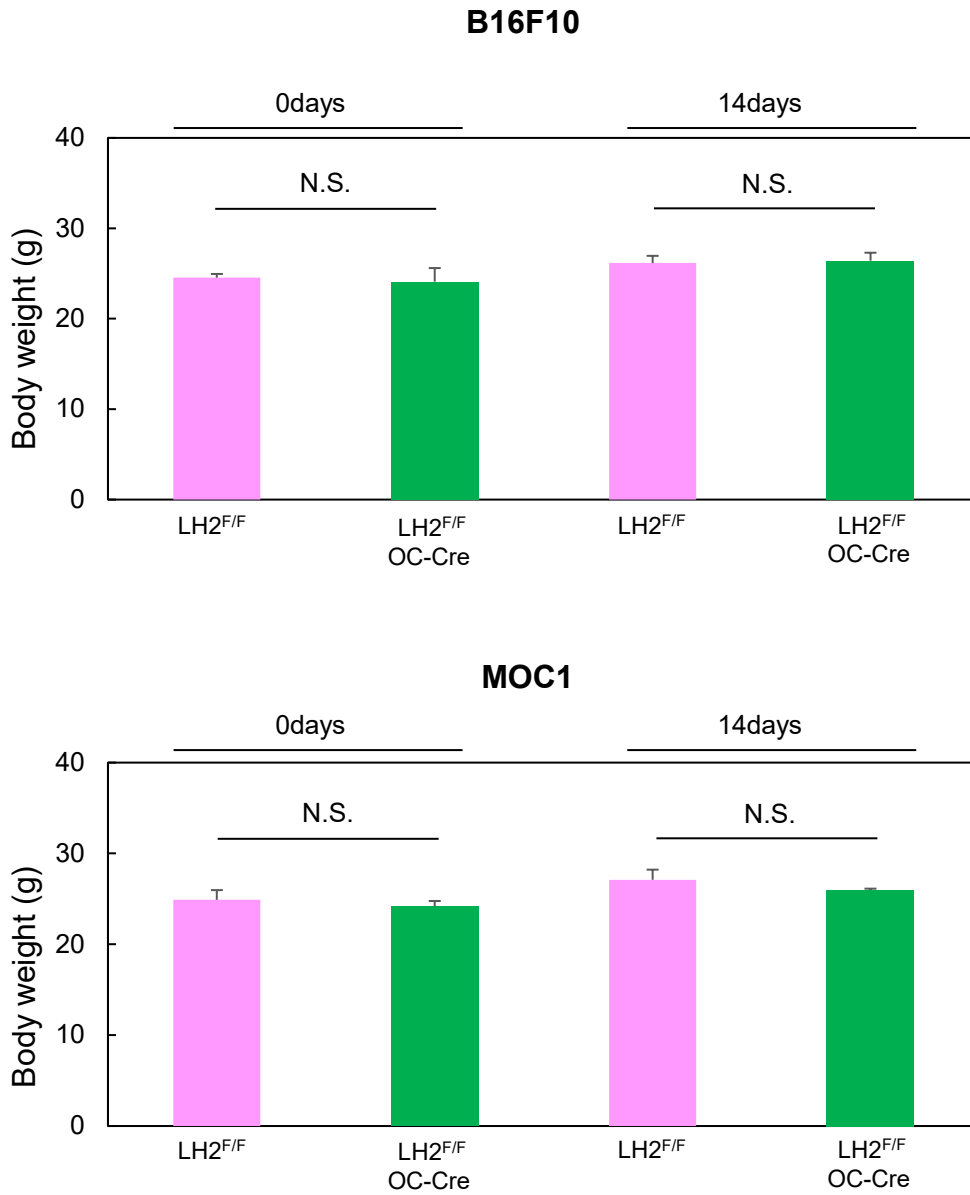

### Supplementary Figure S3 | Body weight changes during bone invasion experiments.

Body weights of LH2<sup>F/F</sup> and LH2<sup>F/F</sup> OC-Cre mice were measured on day 0 and day 14 after intra-femoral cancer cell injection. Data are presented as mean  $\pm$  SD (n = 5 per group). No significant difference was observed between groups (Welch's t-test).

**Supplemental Figure S4**  
**(Full length blots of Figure 5A )**

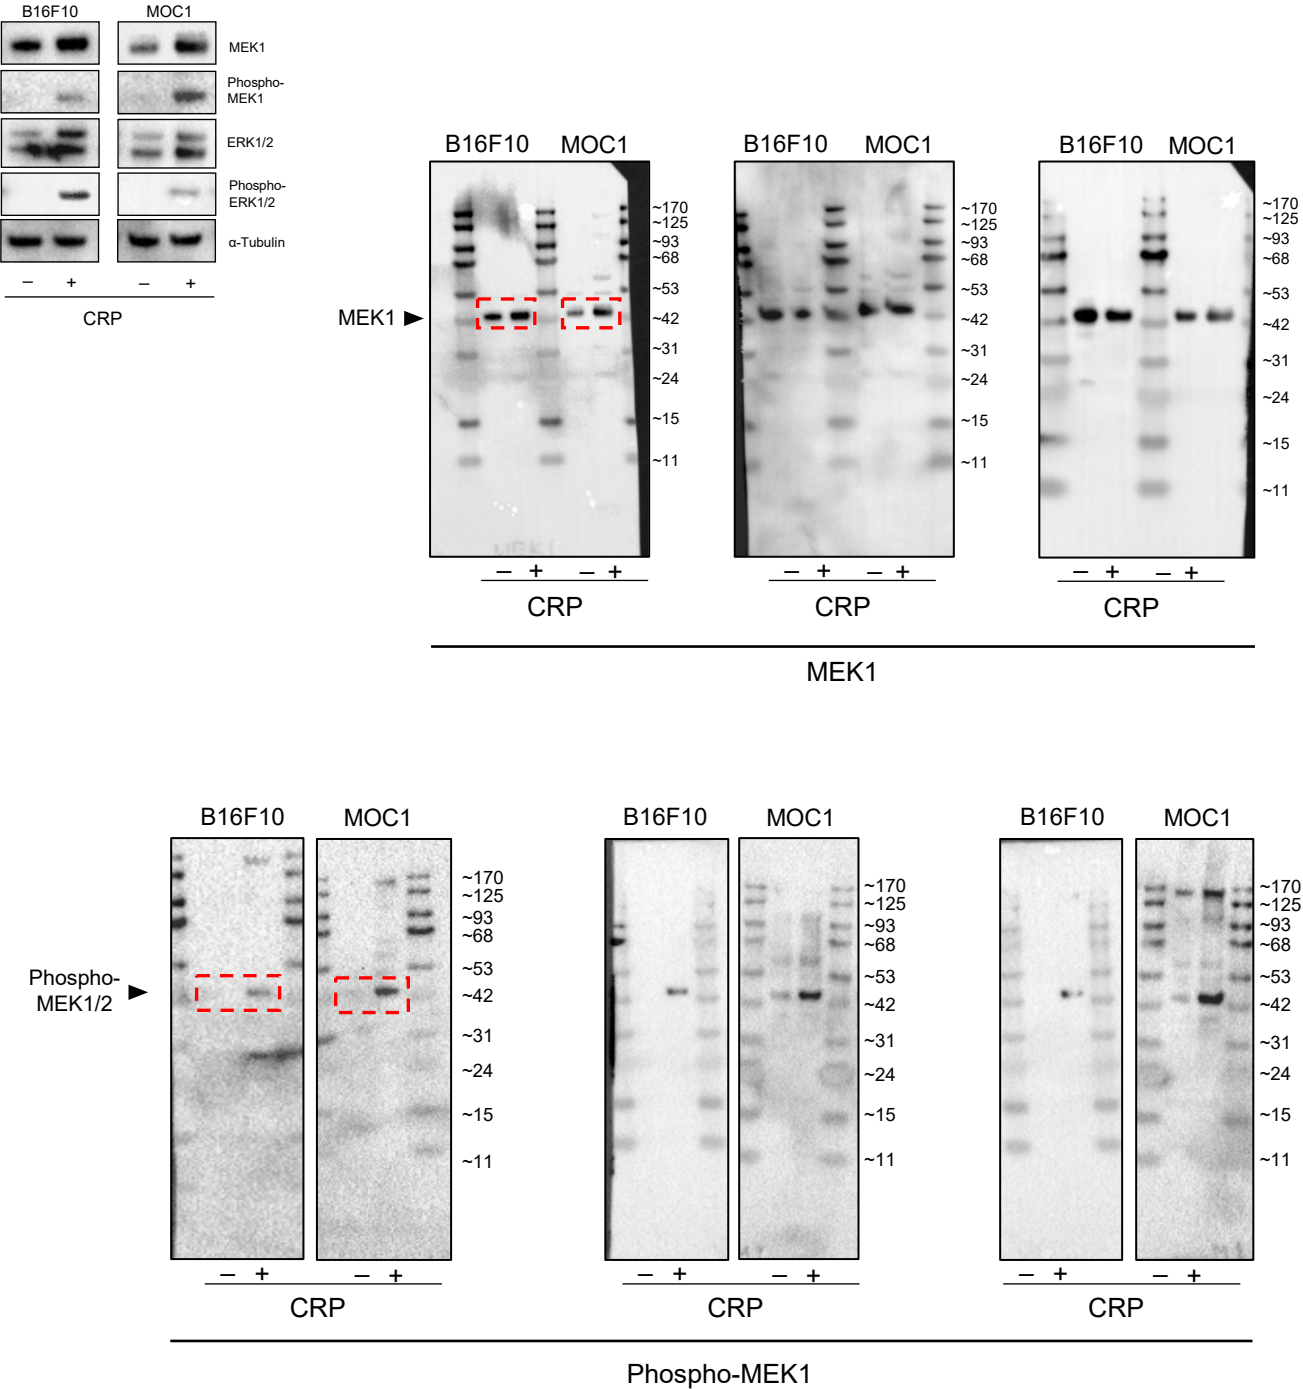

**Supplementary Figure S4 | Full-length unprocessed Western blots of MEK1 and phospho-MEK1.**

The samples derived from these experiments were used for immunoblotting shown in Figures 5A. MEK1 and phospho-MEK1 were detected on separate membranes derived from the same samples. Three independent experiments are shown. All blots were detected under identical exposure and contrast settings.

**Supplemental Figure S5**  
**(Full length blots of Figure 5A )**

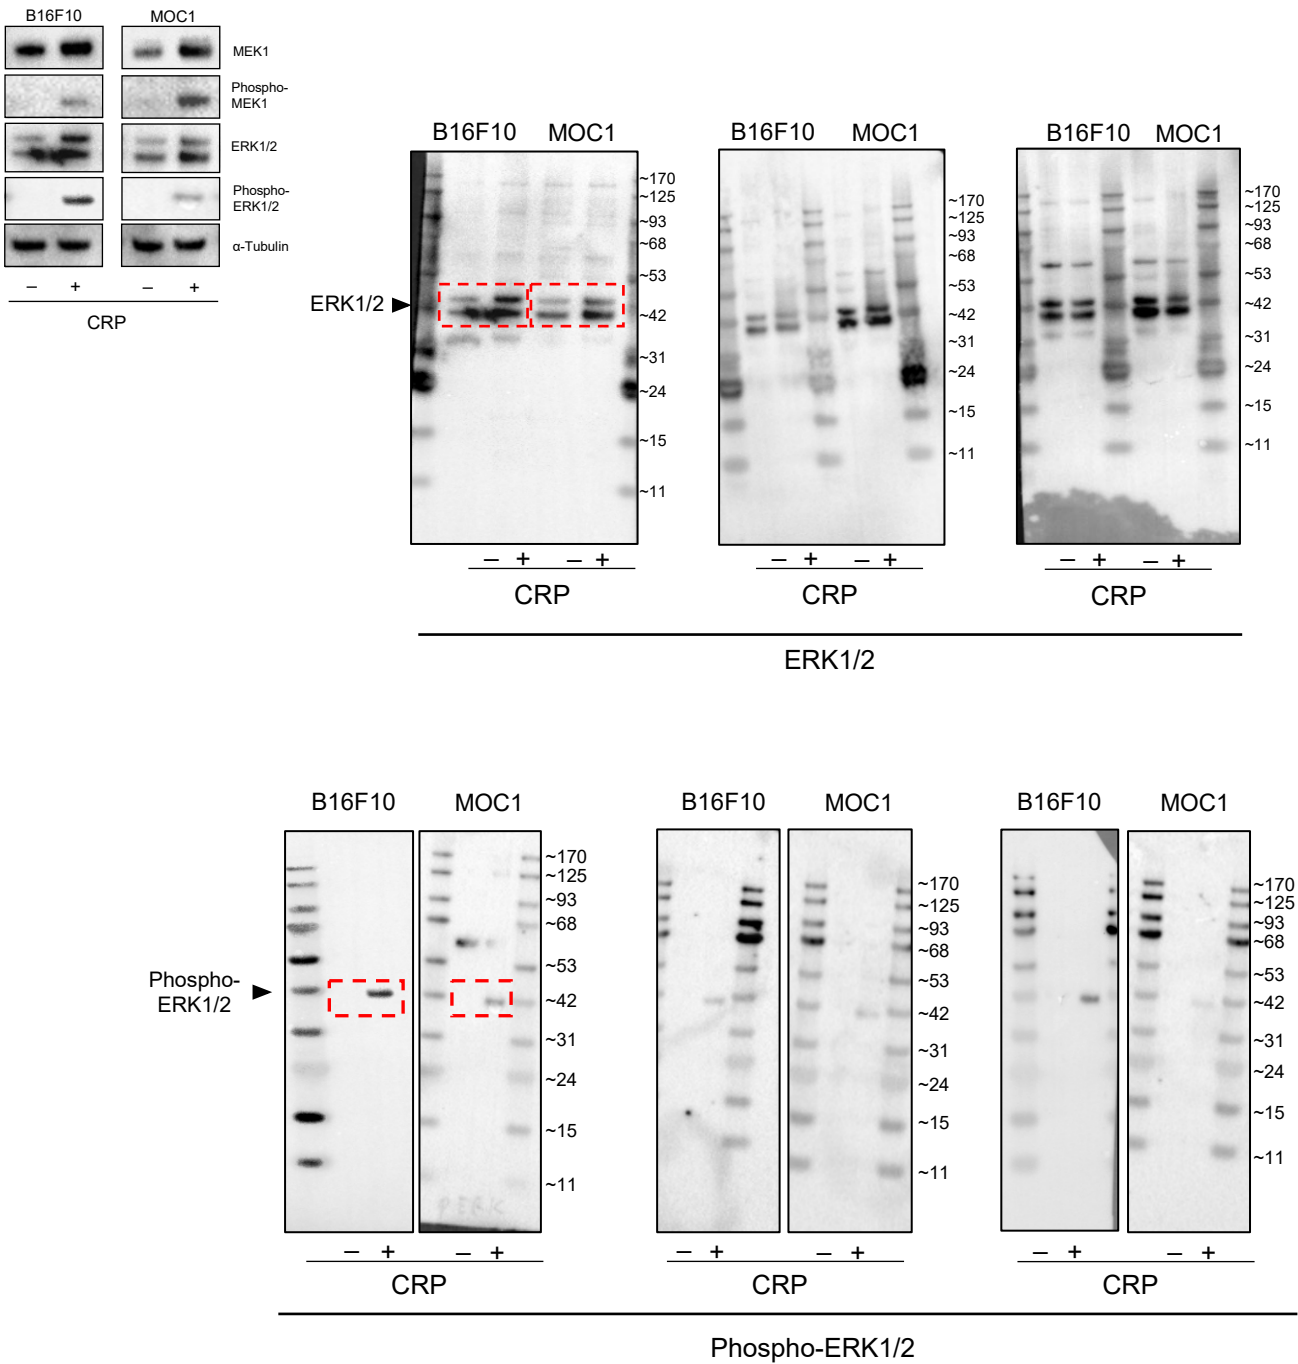

**Supplementary Figure S5 | Full-length unprocessed Western blots of ERK1/2 and phospho-ERK1/2.**

The samples derived from these experiments were used for immunoblotting shown in Figures 5A. ERK1/2 and phospho-ERK1/2 were detected on separate membranes derived from the same samples. Three independent experiments are shown. All blots were detected under identical exposure and contrast settings.

# **Supplemental Figure S6** **(Full length blots of Figure 5A )**

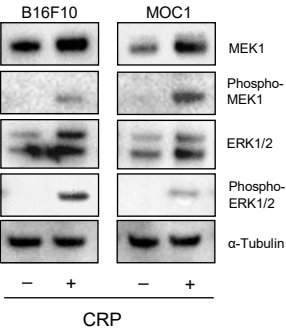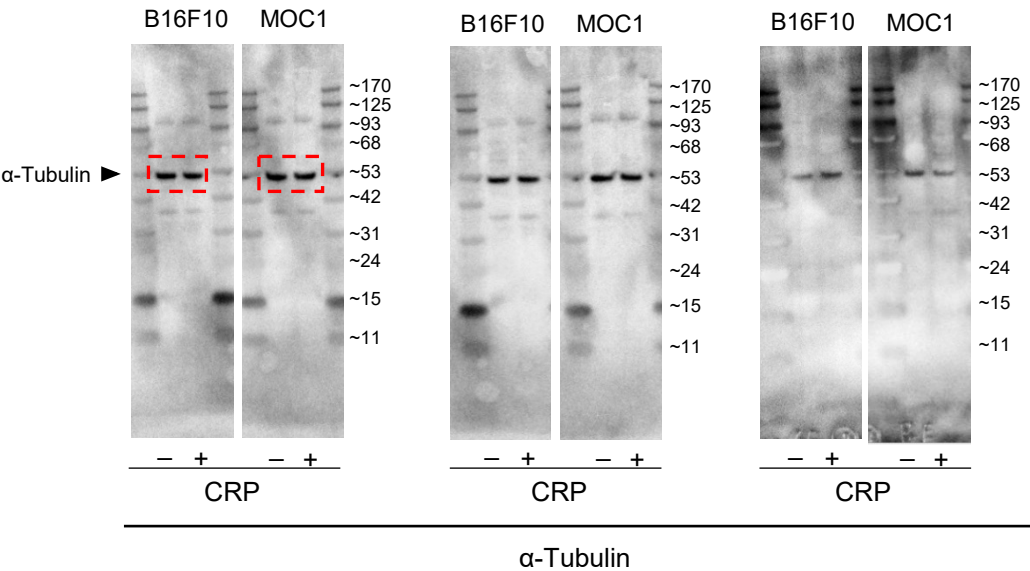

## **Supplemental Figure S6 | Full-length unprocessed Western blots of α-Tubulin.**

The samples derived from these experiments were used for immunoblotting shown in Figures 5A. α-Tubulin was detected on separate membranes derived from the same samples. Three independent experiments are shown. All blots were detected under identical exposure and contrast settings.

# **Supplemental Figure S7** (Full length blots of Figure 5B )

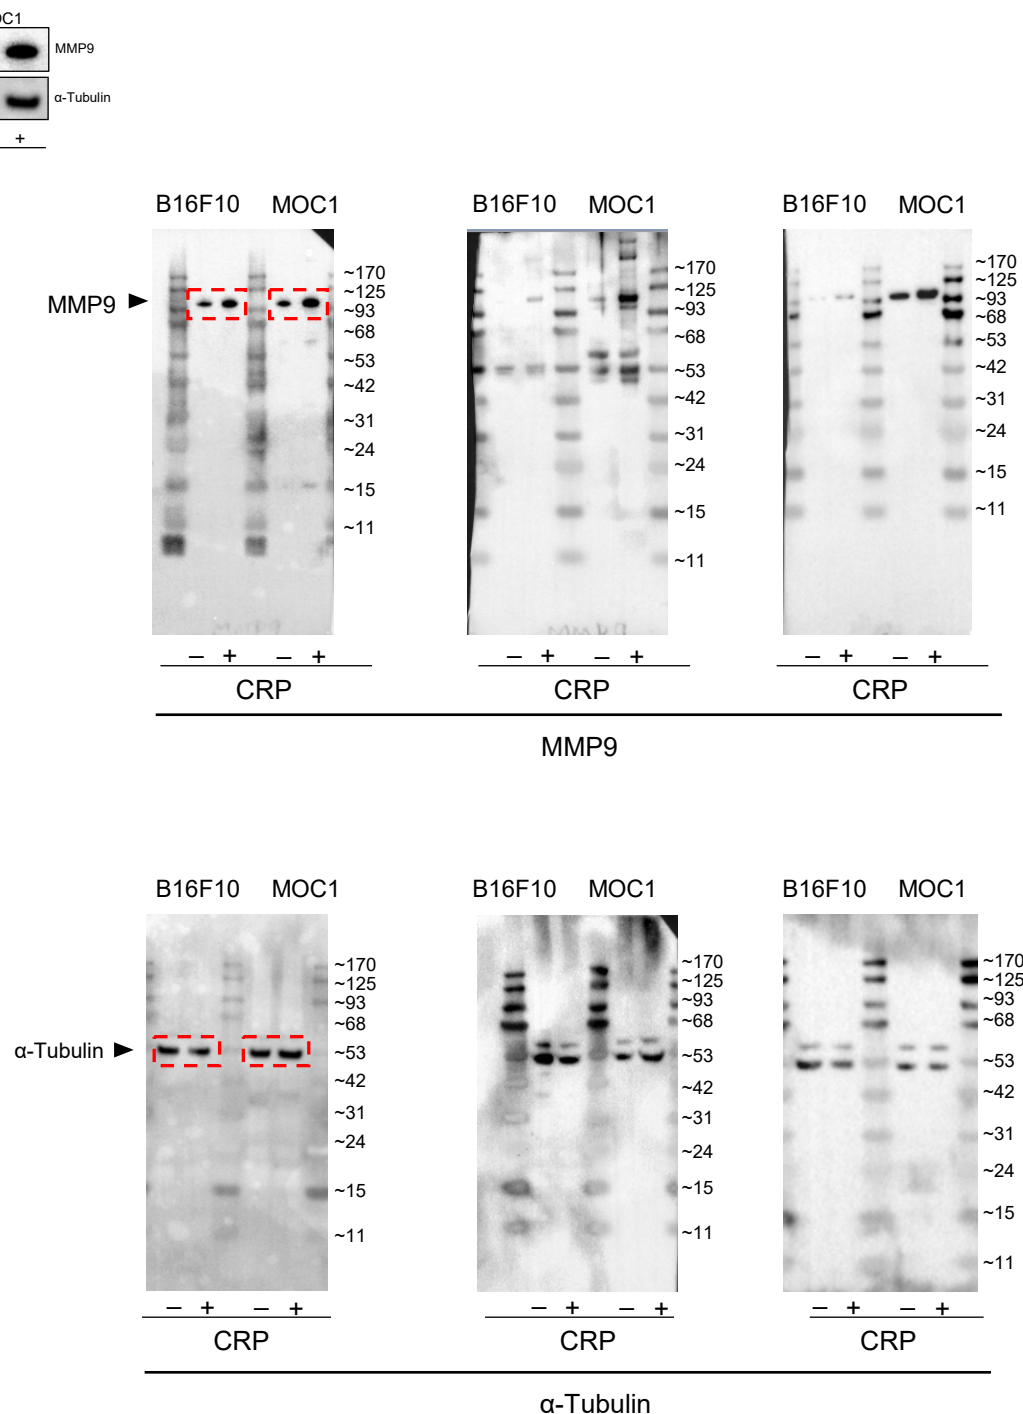

**Supplementary Figure S7 | Full-length unprocessed Western blots of MMP9 and α-Tubulin.**

The samples derived from these experiments were used for immunoblotting shown in Figures 5B. MMP9 and α-Tubulin were detected on separate membranes derived from the same samples. Three independent experiments are shown. All blots were detected under identical exposure and contrast settings.
